# Supplementary material
Source: PubMed Central journal article supplement (PMC8115060)
Supplement: 41423_2020_525_MOESM1_ESM.pdf [file 41423_2020_525_MOESM1_ESM.pdf]

# **The brake mode for RKIP on inflammasome activation and inflammasome-dependent diseases.**

## **Supplementary Figures and legends**

Supplementary Figure 1 , related to Figure 1; Supplementary Figure 2 , related to Figure 5;

Supplementary Figure 3 , related to Figure 6.

Supplemental Figure 1

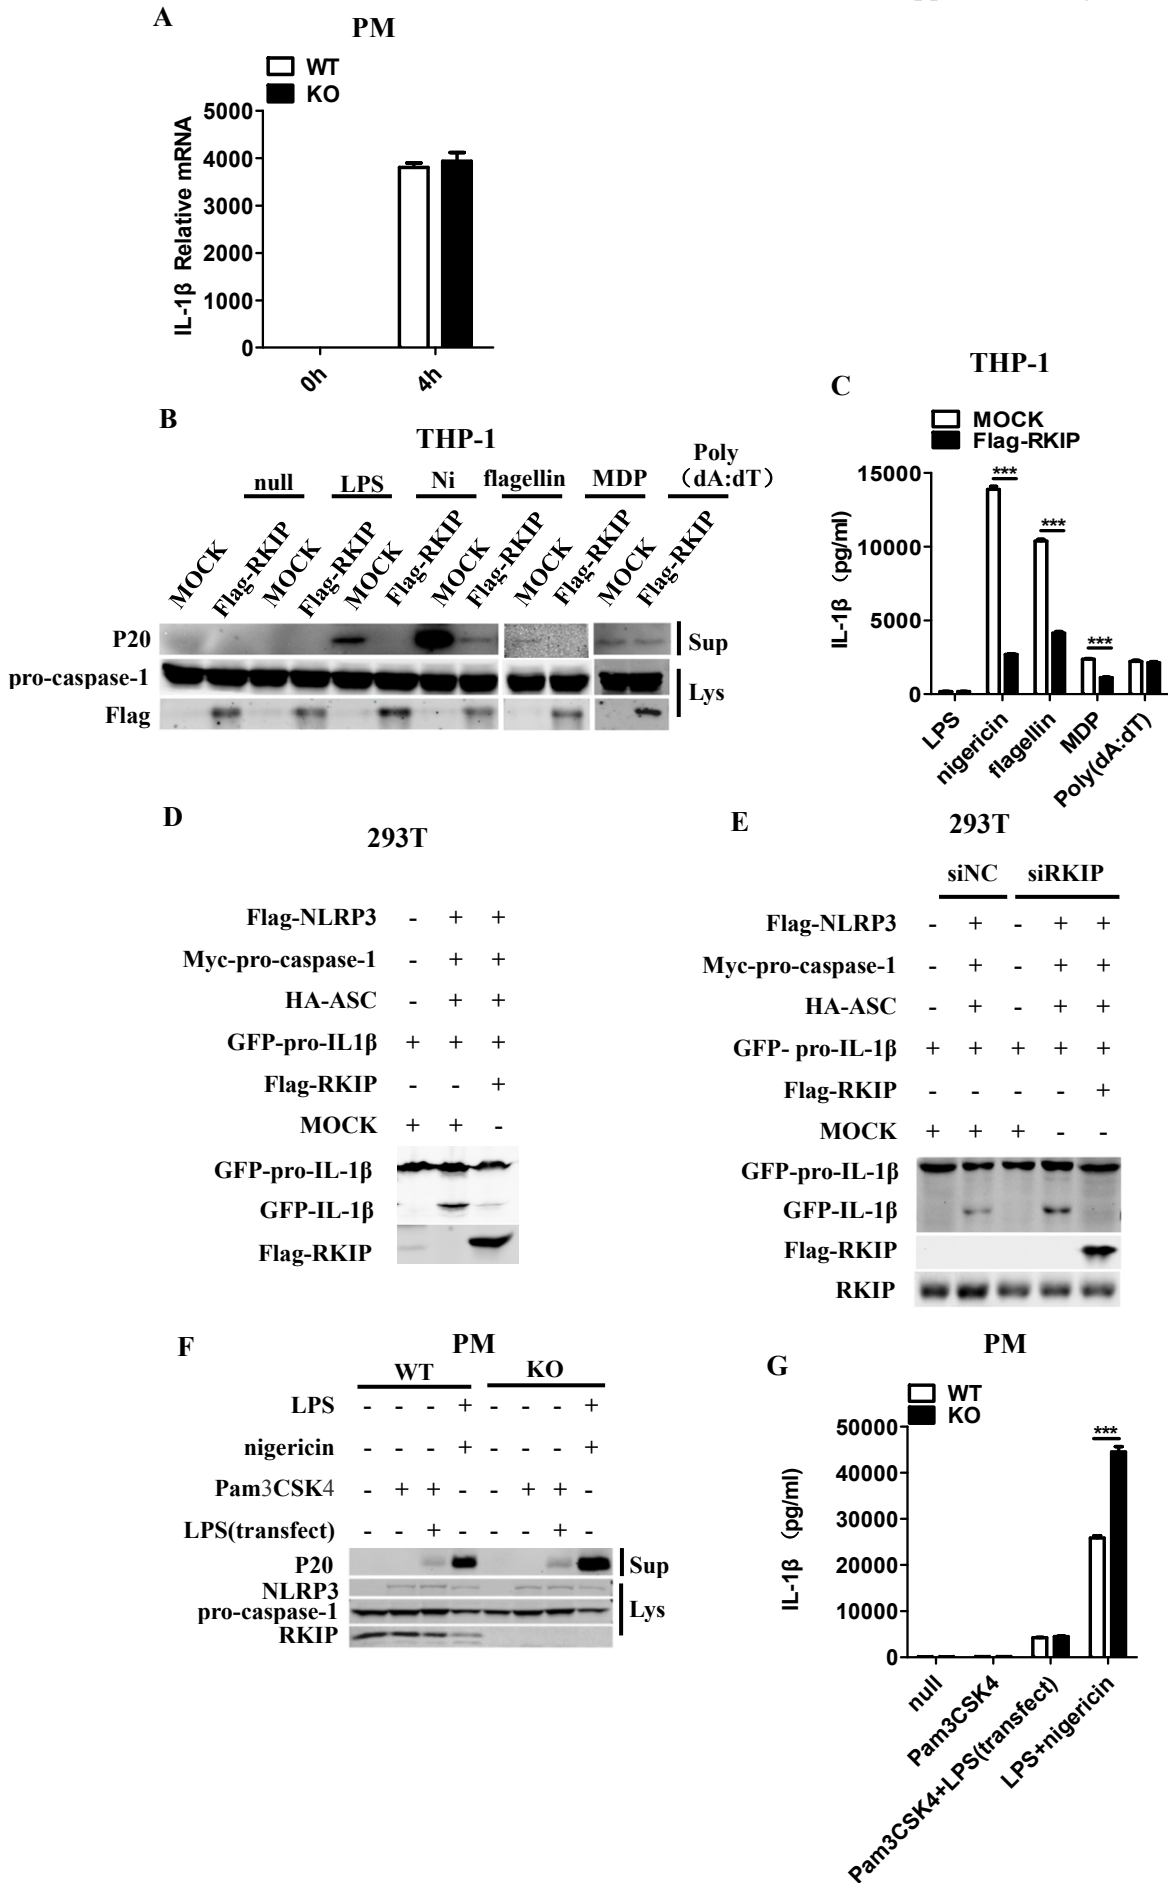

**Figure S1 RKIP inhibits NLRP1, NLRP3 and NLRC4 inflammasomes activation *in vitro*.**

**(A)**  $1 \times 10^6$  wild-type (WT) or Rkip-knockout (KO) peritoneal macrophages (PMs) were stimulated with LPS (1  $\mu\text{g/ml}$ ) for 4 hours. Cell extracts were analyzed by quantitative PCR for mRNA expression of pro-IL-1 $\beta$ .

**(B and C)**  $1 \times 10^6$  MOCK or THP1 stable transfectants were differentiated with 100 nM PMA overnight in 12-well plates, then were primed with LPS and treated with nigericin (Ni), flagellin, Poly(dA:dT) and MDP for indicated times. Immunoblotting analysis of the supernatants (Sup) and cell extracts (Lys) **(B)**, and ELISA analysis of the supernatants (Sup) for IL-1 $\beta$  release **(C)**.

**(D)** Mock or Flag-RKIP was co-transfected with Flag-NLRP3, Myc-pro-caspase-1, HA-ASC and GFP-pro-IL-1 $\beta$  into 293T cells ( $2 \times 10^5$ ), immunoblotting analysis of the mature IL-1 $\beta$  after 24 hours.

**(E)** The expression of RKIP was knockdown in 293T cells ( $1 \times 10^5$ ) by using a specific siRNA, and then the cells were co-transfected with Mock or Flag-RKIP and Flag-NLRP3, Myc-pro-caspase-1, HA-ASC and GFP-pro-IL-1 $\beta$ , immunoblotting analysis of the mature IL-1 $\beta$  after 24 hours.

**(F and G)**  $1 \times 10^6$  WT or Rkip-KO PMs were primed with Pam3CSK4 and transfected with LPS (2  $\mu\text{g/ml}$ ) or primed with LPS and treated with nigericin (Ni) (20  $\mu\text{M}$ ) for indicated times. Immunoblotting analysis of the supernatants (Sup) and cell extracts (Lys) **(F)**, and ELISA analysis of the supernatants (Sup) for IL-1 $\beta$  release **(G)**.

Data are mean  $\pm$  SEM **(A,C and G)** and representative of three independent experiments.

Student's t test was used for statistical calculation. \*  $p < 0.05$ , \*\*  $p < 0.01$ , \*\*\* $p < 0.001$ .

Supplemental Figure 2

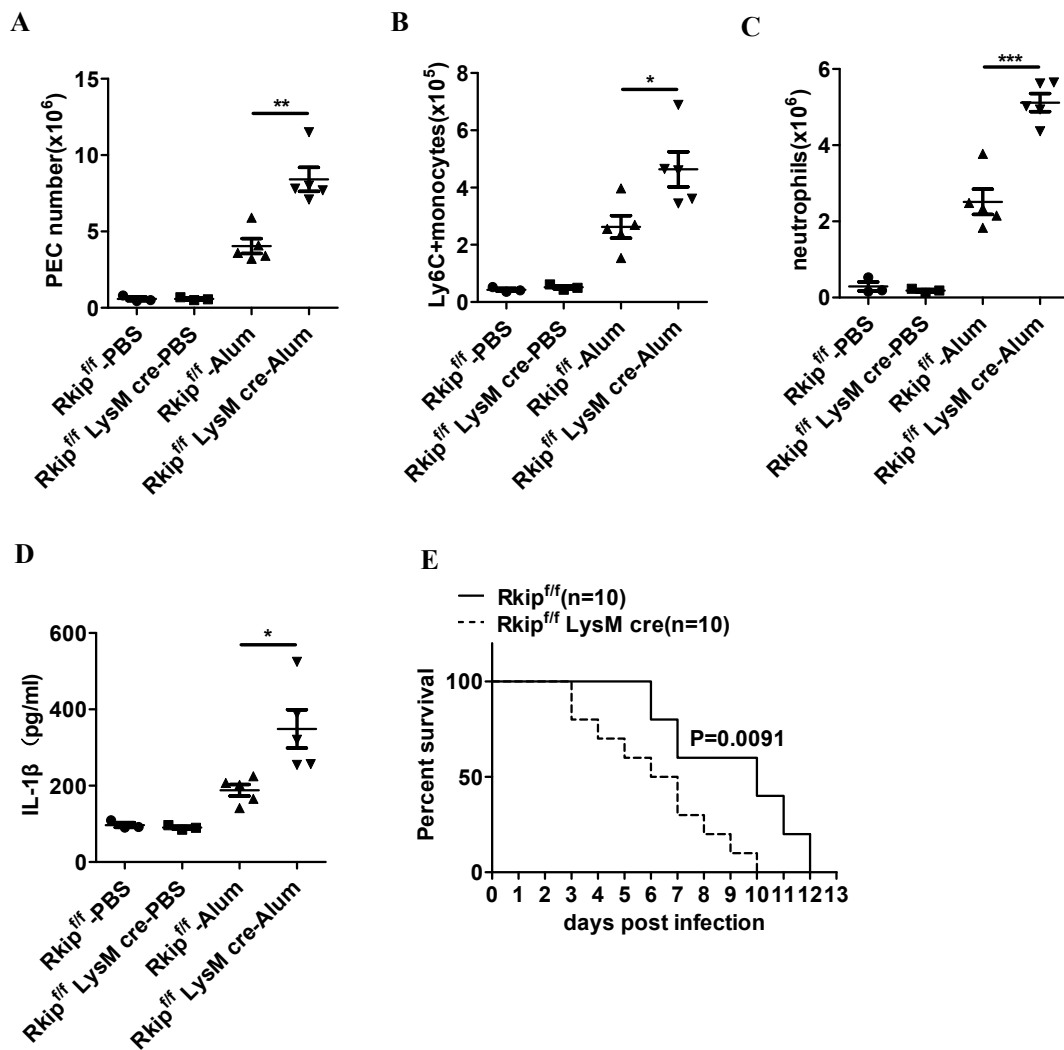

**Figure S2 Rkip myeloid-knockout promotes NLRP3 and NLRC4 inflammasome activation *in vivo*.**

(A-D) Rkip<sup>f/f</sup> and Rkip<sup>f/f</sup> LysM Cre mice were intraperitoneally injected of with Alum (50 mg/kg body weight) to induce peritonitis. After 12 hours, the mice were sacrificed and the peritoneal cavities were washed with 10 ml ice-cold PBS. FACS analysis of peritoneal exudates cells (PECs) (A) , Ly6C<sup>+</sup> monocytes (B) or neutrophils (C) and ELISA analysis of IL-1β (D) in the peritoneal lavage fluid (PLF) (n=3-5 mice per group).

(E) Survival of Rkip<sup>f/f</sup> and Rkip<sup>f/f</sup> LysM Cre mice infected intraperitoneally with 5x10<sup>2</sup> CFU

log-phase *S. typhimurium* (n=10 mice per group).

Data are mean  $\pm$  SEM (**A-D**) and representative of two independent experiments. Student's t test

was used for statistical calculation. \*  $p < 0.05$ , \*\*  $p < 0.01$ , \*\*\* $p < 0.001$ .

Supplemental Figure 3

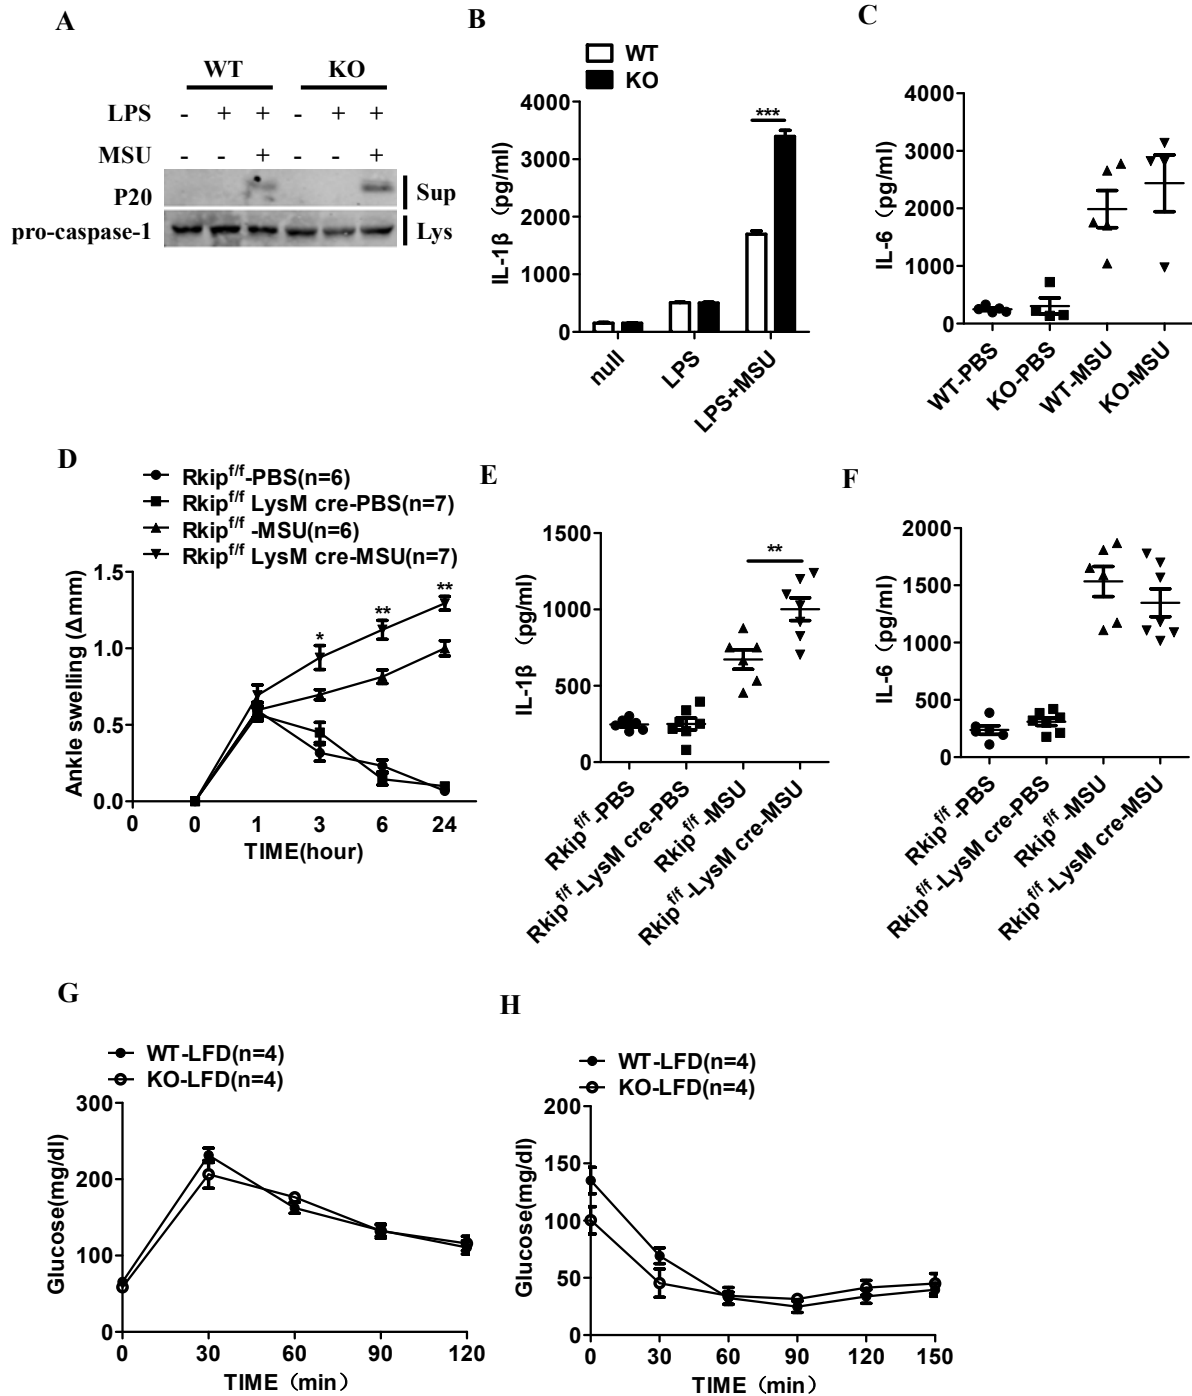

**Figure S3 Rkip myeloid-knockout mice are more sensitive to NLRP3 inflammasome-related diseases.**

(A and B)  $1 \times 10^6$  WT or Rkip-KO PMs were primed with LPS and treated with MSU (300  $\mu$ g/ml) for 12 hours, immunoblotting analysis of the supernatants (Sup) and cell extracts (Lys) (A), and ELISA analysis of the supernatants (Sup) for IL-1 $\beta$  release (B).

(C) WT and Rkip-KO mice were injected with MSU (0.5 mg) in the ankle to induce inflammation,

and ELISA analysis of IL-6 (24 hours later) in ankle culture from WT and Rkip-KO mice (n=4-5 mice per group).

**(D-F)** Rkip<sup>fl/fl</sup> and Rkip<sup>fl/fl</sup> LysM Cre mice were injected with MSU (0.5 mg) in the ankle to induce inflammation. Time course of changes in MSU induced ankle swelling of Rkip<sup>fl/fl</sup> and Rkip<sup>fl/fl</sup> LysM Cre mice **(D)**, and ELISA analysis of IL-1 $\beta$  **(E)** and IL-6 **(F)** (24 hours later) in ankle culture from Rkip<sup>fl/fl</sup> and Rkip<sup>fl/fl</sup> LysM Cre mice (n=6-7 mice per group).

**(G and H)** GTTs **(G)** and ITTs **(H)** in WT and Rkip-KO mice after LFD feeding for 24 weeks (n=4 mice per group).

Error bars represent SEM for **D**, **G** and **H**, data are mean  $\pm$  SEM **(B,C,E and F)**, and are representative of two independent experiments. Student's t test was used for statistical calculation.

\* p < 0.05, \*\* p < 0.01, \*\*\*p < 0.001.
